# Supplementary material
Source: PubMed Central journal article supplement (PMC9309399)
Supplement: mmc1.pdf [file mmc1.pdf]

**Supplementary Table 1.** Baseline characteristics of the 38 nursing home residents included in the analysis are depicted as median (range) for continuous variables or as number (percentage) otherwise.

|                                            |                                                     |
|--------------------------------------------|-----------------------------------------------------|
| Age (years old)                            | 88 (72-101)                                         |
| Female sex                                 | 30 (78.95%)                                         |
| Male sex                                   | 8 (21.05%)                                          |
| Delay vaccine doses 1-2 (days)             | 21 (18-31)                                          |
| Delay vaccine doses 2-3 (days)             | 236 (194-250)                                       |
| Delay vaccine dose 2 - 1st sampling (days) | 56 (28-68)                                          |
| Delay vaccine dose 3 - 2nd sampling (days) | 55 (48-64)                                          |
| Convalescent                               | 30 (78.95%)                                         |
| Nursing home                               | A: 19 (50.00%)<br>B : 13 (34.21%)<br>C : 6 (15.79%) |

**Supplementary Table 2.** Individual characteristics of the 13 nursing home residents who developed a breakthrough infection after the 3<sup>rd</sup> vaccine dose.

SARS-CoV-2 variant responsible for breakthrough infection :

§ omicron suspicion based on identification of a variant not harboring E484K/Q or L452R mutations

£ omicron suspicion based on identification of a variant harboring K417N mutation

unk unknown variant due to insufficient viral load

|           | Nursing home | Age | Sex    | Convalescent | Breakthrough infection characteristics |                                                       |                                |            |
|-----------|--------------|-----|--------|--------------|----------------------------------------|-------------------------------------------------------|--------------------------------|------------|
|           |              |     |        |              | Diagnostic date                        | Delay vaccine dose 3 - breakthrough diagnostic (days) | SARS-CoV-2 variant             | Symptoms   |
| <b>1</b>  | A            | 92  | Female | Yes          | 21/01/2022                             | 112                                                   | omicron suspicion <sup>§</sup> | No         |
| <b>2</b>  | A            | 90  | Female | No           | 13/01/2022                             | 93                                                    | omicron suspicion <sup>§</sup> | Yes (mild) |
| <b>3</b>  | A            | 85  | Female | No           | 15/01/2022                             | 106                                                   | omicron suspicion <sup>§</sup> | Yes (mild) |
| <b>4</b>  | A            | 101 | Female | No           | 21/01/2022                             | 112                                                   | unk                            | No         |
| <b>5</b>  | A            | 82  | Female | Yes          | 17/01/2022                             | 97                                                    | omicron suspicion <sup>§</sup> | No         |
| <b>6</b>  | A            | 88  | Female | Yes          | 17/01/2022                             | 104                                                   | omicron suspicion <sup>§</sup> | Yes (mild) |
| <b>7</b>  | A            | 92  | Female | Yes          | 17/01/2022                             | 97                                                    | omicron suspicion <sup>§</sup> | Yes (mild) |
| <b>8</b>  | A            | 89  | Female | Yes          | 31/01/2022                             | 118                                                   | omicron suspicion <sup>£</sup> | No         |
| <b>9</b>  | A            | 72  | Male   | Yes          | 31/01/2022                             | 118                                                   | omicron suspicion <sup>£</sup> | Yes (mild) |
| <b>10</b> | A            | 77  | Female | No           | 27/01/2022                             | 118                                                   | omicron suspicion <sup>£</sup> | No         |
| <b>11</b> | A            | 89  | Female | No           | 24/01/2022                             | 115                                                   | omicron suspicion <sup>£</sup> | Yes (mild) |
| <b>12</b> | A            | 86  | Female | No           | 31/01/2022                             | 118                                                   | omicron suspicion <sup>£</sup> | No         |
| <b>13</b> | C            | 91  | Female | Yes          | 28/12/2021                             | 83                                                    | unk                            | No         |
